# Supplementary material for: An Integrated In Silico and In Vitro Approach for the Identification of Natural Products Active against SARS-CoV-2
Source: MDPI journal article supplement (doi:10.3390/biom14010043), 2023-12-28
Supplement: s1 [file s1]

*Supporting Information*

# **An Integrated In Silico and In Vitro Approach for the Identification of Natural Products Active against SARS-CoV-2**

**Rosamaria Pennisi <sup>1,\*</sup>, Davide Gentile <sup>2,\*</sup>, Antonio Rescifina <sup>3</sup>, Edoardo Napoli <sup>4</sup>, Paola Trischitta <sup>1,5</sup>, Anna Piperno <sup>1</sup> and Maria Teresa Sciortino <sup>1</sup>**

<sup>1</sup> Department of Chemical, Biological, Pharmaceutical and Environmental Science, University of Messina, Viale Ferdinando Stagno d'Alcontres 31, 98166 Messina, Italy; paola.trischitta@studenti.unime.it (P.T.); anna.piperno@unime.it (A.P.); mtsciortino@unime.it (M.T.S.)

<sup>2</sup> Department of Chemistry, Materials and Chemical Engineering "G. Natta", Politecnico di Milano, Via Mancinelli 7, 20131 Milano, Italy

<sup>3</sup> Department of Drug and Health Sciences, University of Catania, V.le A. Doria 6, 95125 Catania, Italy; arescifina@unict.it

<sup>4</sup> Istituto di Chimica Biomolecolare—Consiglio Nazionale delle Ricerche, 95126 Catania, Italy; edoardo.napoli@icb.cnr.it

<sup>5</sup> Department of Chemistry, Biology and Biotechnology, University of Perugia, Via Elce di Sotto 8, 06123 Perugia, Italy

\* Correspondence: rpennisi@unime.it (R.P.); davide.gentile@polimi.it (D.G.)

### Samples preparation

Commercially available cynarin (CY), rosmarinic acid (RA), folic acid (FA), and luteolin-7-O-glucuronide (L7OG) were used to prepare the respective stock solutions. Specifically, L7OG was dissolved in DMSO to obtain a 5.5 mM solution, RA was dissolved in water to obtain an 8.0 mM solution, CY was dissolved in methanol to obtain a 4.7 mM solution, and FA was dissolved in ethanol to obtain an 8.7 mM solution.

### Viability assay of natural compounds

VERO cells were exposed to different concentrations of L7OG, CY, FA, and RA for 72 h and incubated with CCK8 tetrazolium salt for 4 h before measuring the absorbance values in a microplate reader. The percentage of cellular viability was calculated and compared to untreated cells. The 50% cytotoxic concentration ( $CC_{50}$ ) was reported in Table S1.

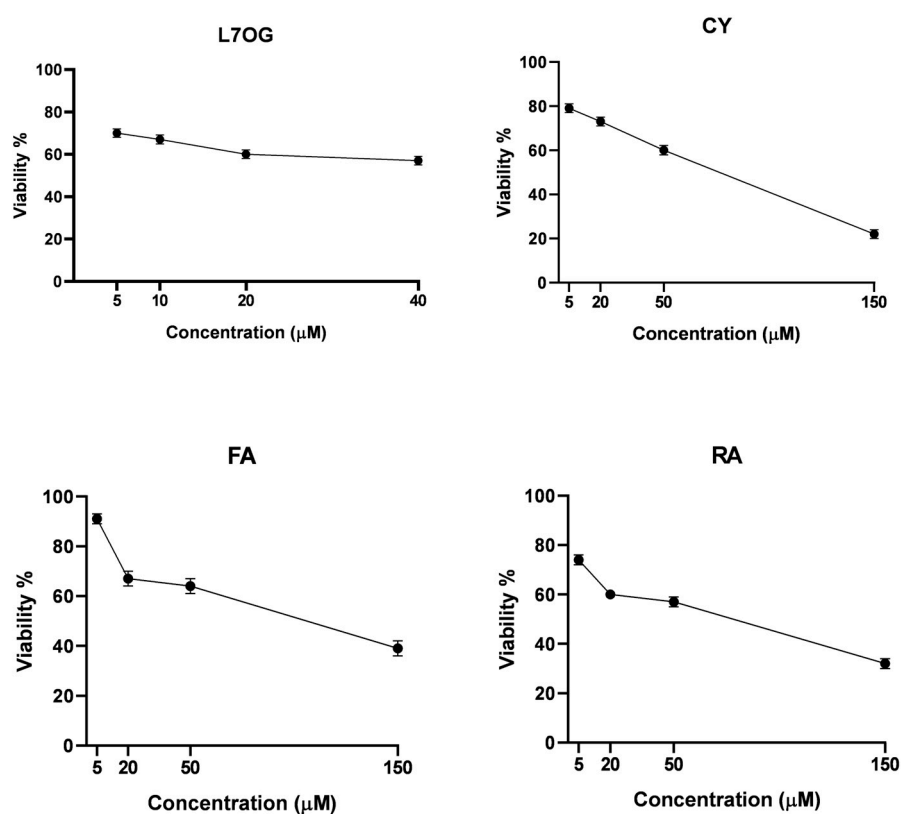

**Figure S1.** Cellular viability assay following treatment with different L7OG, CY, FA, and RA concentrations. VERO cells were incubated for 24 h with various concentrations of natural compounds, as reported in the material and methods section. Results represent the mean of three biologically independent experiments  $\pm$  SD.

**Table S1.** Cytotoxicity ( $CC_{50}$ ) values (μM) of natural compounds on VERO cells.

| Compound | $CC_{50}$ |
|----------|-----------|
| L7OG     | 55.71     |
| CY       | 91.47     |
| FA       | 107.16    |
| RA       | 78.30     |



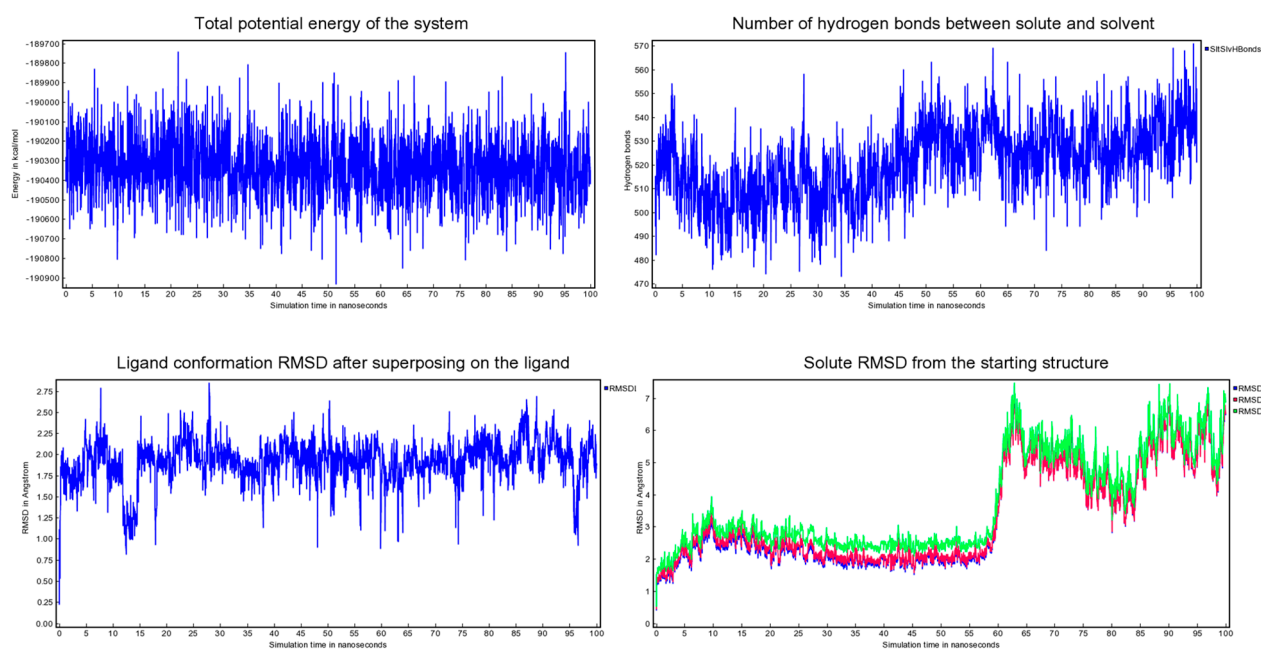

**Figure S3.** L7OG/3CL<sup>Pro</sup>. Total energy (top left) and the number of hydrogen bonds between solute and solvent of 3CL<sup>Pro</sup> enzyme and its complexes with ligand (top right). RMSD of the ligand (bottom left) and solute RMSD from the starting structure inside the binding pocket of 3CL<sup>Pro</sup> enzyme (bottom right).

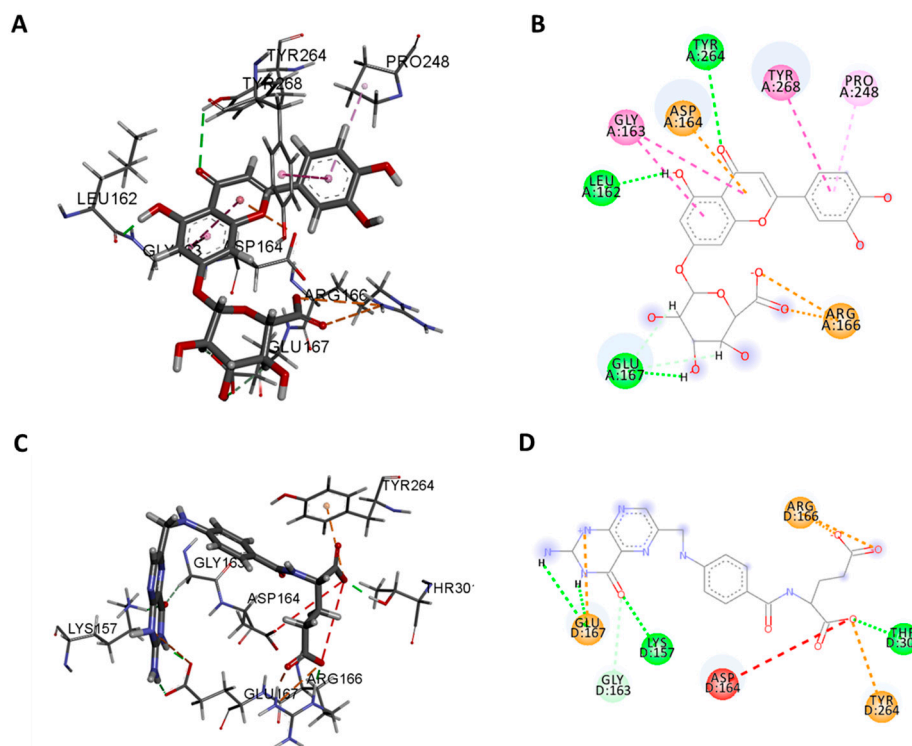

**Figure S4.** (A) Interaction profile of the best-docked poses for L7OG/PL<sup>pro</sup> (B) and 2D diagram interaction profile. (C) Interaction profile of the best-docked poses for FA/PL<sup>pro</sup> (D) and 2D diagram interaction profile.

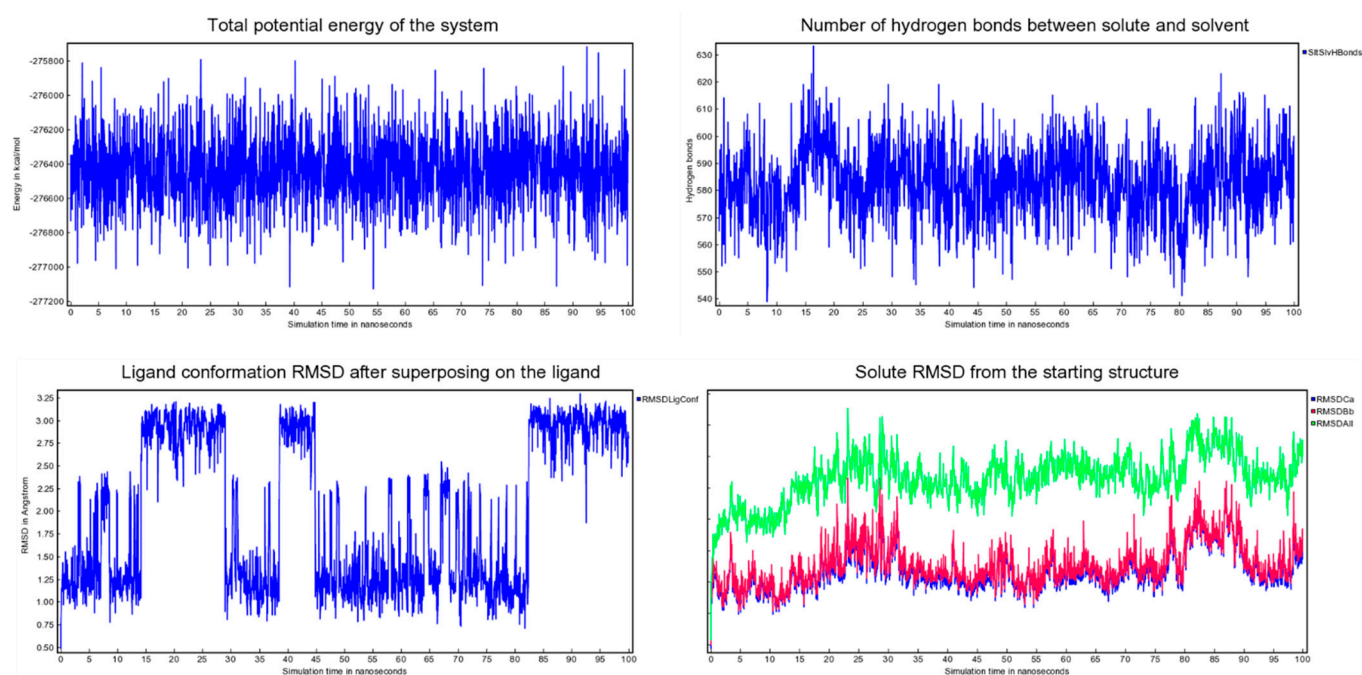

**Figure S5.** L7OG/PL<sup>pro</sup>. Total energy (up-left) and the number of hydrogen bonds between solute and solvent of PL<sup>pro</sup> enzyme and its complexes with ligand (top right). RMSD of the ligand (bottom left) and solute RMSD from the starting structure inside the binding pocket of PL<sup>pro</sup> enzyme (bottom right).

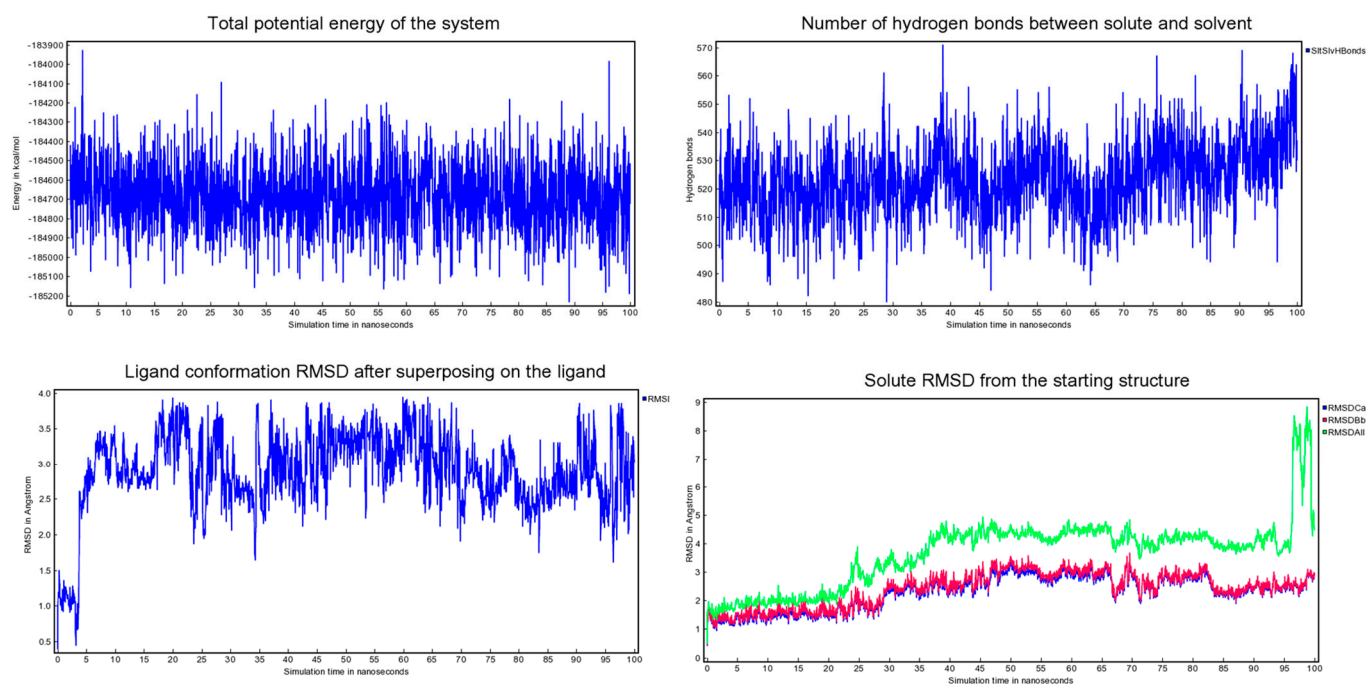

**Figure S6.** FA/PL<sup>pro</sup>. Total energy (up-left) and the number of hydrogen bonds between solute and solvent of PL<sup>pro</sup> enzyme and its complexes with ligand (top right). RMSD of the ligand (bottom left) and solute RMSD from the starting structure inside the binding pocket of PL<sup>pro</sup> enzyme (bottom right).

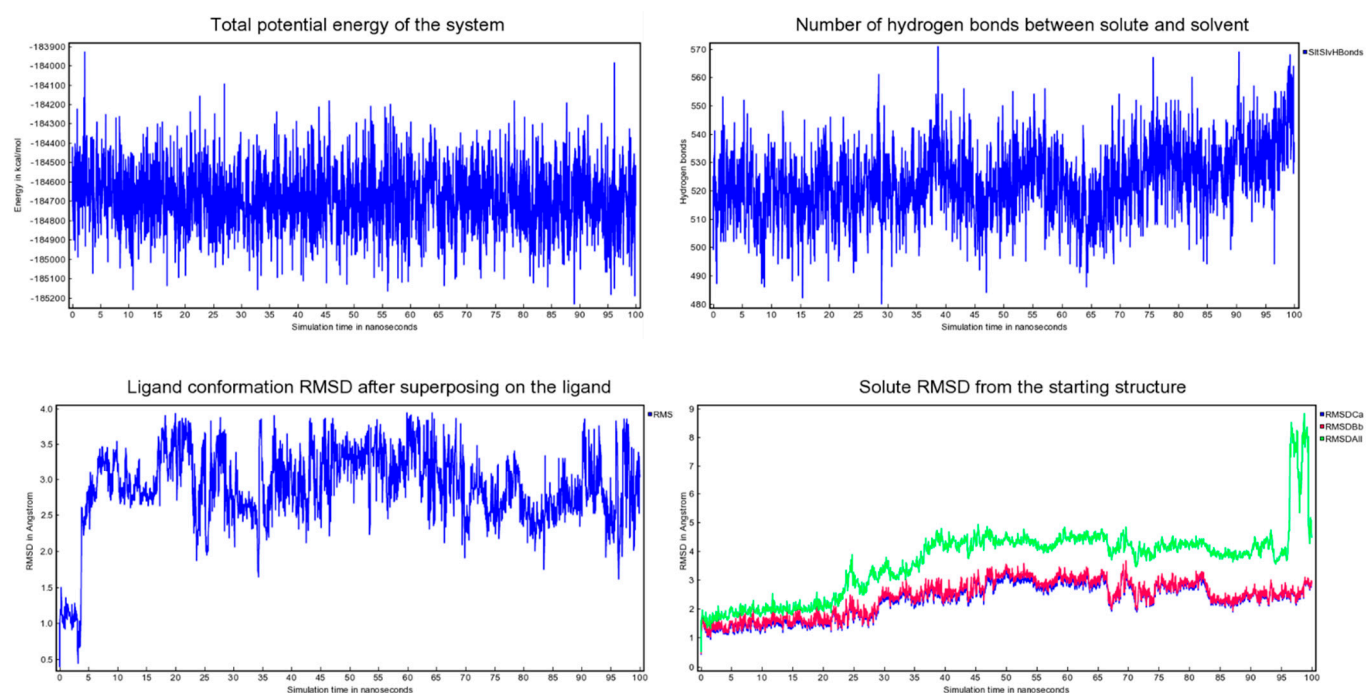

**Figure S7.** FA/3CL<sup>pro</sup>. Total energy (up-left) and the number of hydrogen bonds between solute and solvent of 3CL<sup>pro</sup> enzyme and its complexes with ligand (top right). RMSD of the ligand (bottom left) and solute RMSD from the starting structure inside the binding pocket of 3CL<sup>pro</sup> enzyme (bottom right).

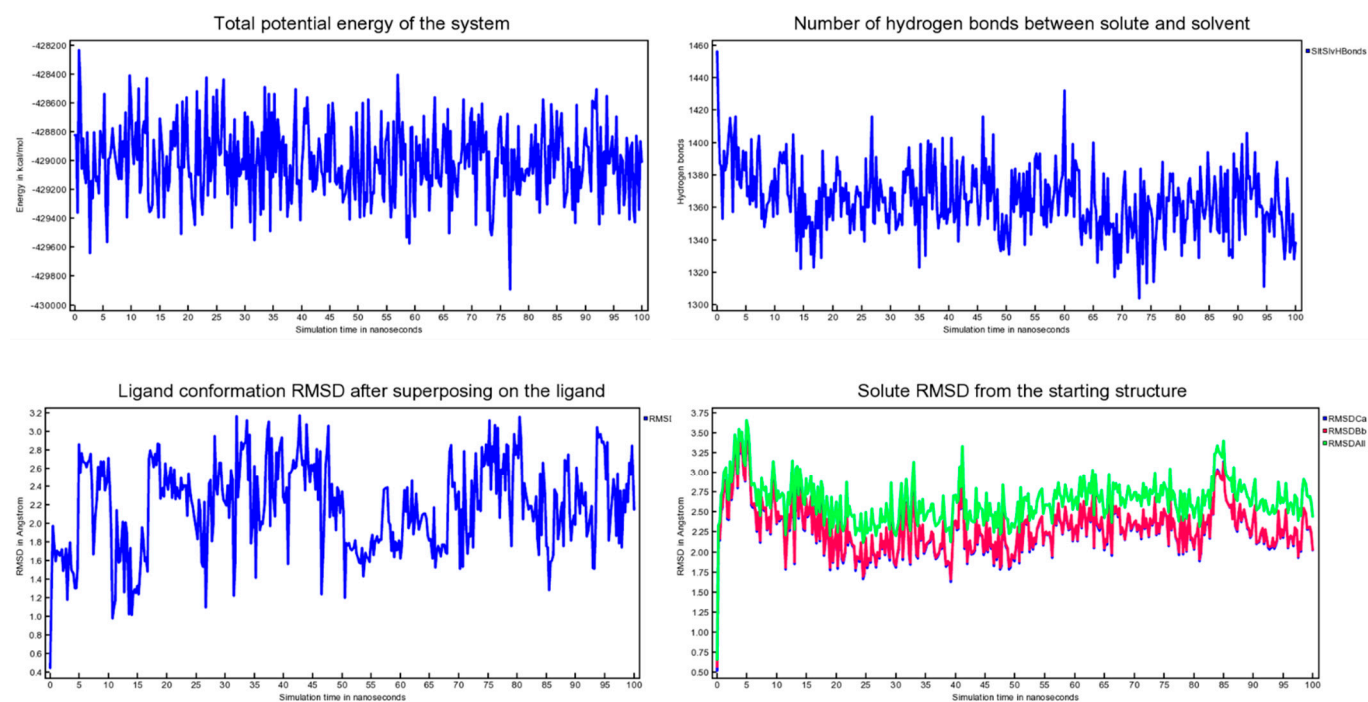

**Figure S8.** FA/o-RBD/ACE2 complex. Total energy (up-left) and the number of hydrogen bonds between solute and solvent of o-RBD/ACE2 complexes with ligand (top right). RMSD of the ligand (bottom left) and solute RMSD from the starting structure inside the binding pocket of o-RBD/ACE2 complexes (bottom right).
